# Supplementary material for: Anti-RBD IgG antibodies from endemic coronaviruses do not protect against the acquisition of SARS-CoV-2 infection among exposed uninfected individuals
Source: PubMed Central journal article supplement (PMC11153698; doi:10.3389/fimmu.2024.1396603), 2024-05-23
Supplement: DataSheet_1.pdf [file DataSheet_1.pdf]

## *Supplementary Material*

**Supplementary Table 1. Cohort Data.** Data from the cohort of real-time discordant couples used in the study: sample number, volunteer registration, gender (infected women: 35%; infected men: 65%), age (average age 46), PCR result (positive/ negative) and evolution of symptoms of COVID-19 (mild/moderate).

| COHORT DATA            |               |                        |        |     |            |          |                 |                 |
|------------------------|---------------|------------------------|--------|-----|------------|----------|-----------------|-----------------|
| PCR discordant couples | Sample Number | Volunteer Registration | Gender | Age | PCR Result | Symptoms | Serology        |                 |
|                        |               |                        |        |     |            |          | RBD             | NP              |
| 1                      | 1             | C028680                | M      | 77  | Positive   | Mild     | Negative        | Positive        |
|                        | 2             | C028681                | F      | 75  | Negative   | -        |                 |                 |
| 2                      | 3             | C028688                | F      | 46  | Positive   | Mild     | Negative        | Positive        |
|                        | 4             | C028689                | M      | 46  | Negative   | -        |                 |                 |
| 3                      | 5             | C028690                | M      | 37  | Positive   | Moderate | Positive        | Positive        |
|                        | 6             | C028691                | F      | 35  | Negative   | -        |                 |                 |
| 4                      | 7             | C028692                | M      | 33  | Positive   | Moderate | Negative        | Positive        |
|                        | 8             | C028693                | F      | 33  | Negative   | -        |                 |                 |
| 5                      | 9             | C028696                | F      | 37  | Positive   | Mild     | Negative        | Positive        |
|                        | 10            | C028697                | F      | 38  | Negative   | -        |                 |                 |
| 6                      | 11            | C028708                | M      | 41  | Positive   | Mild     | Negative        | Positive        |
|                        | 12            | C028709                | F      | 39  | Negative   | -        |                 |                 |
| 7                      | 13            | C028720                | M      | 65  | Positive   | Mild     | Positive        | Positive        |
|                        | 14            | C028721                | F      | 57  | Negative   | -        |                 |                 |
| 8                      | 15            | C028724                | M      | 38  | Positive   | Mild     | <b>Negative</b> | <b>Negative</b> |
|                        | 16            | C028725                | F      | 36  | Negative   | -        |                 |                 |
| 9                      | 17            | C028730                | M      | 44  | Positive   | Moderate | Positive        | Positive        |
|                        | 18            | C028731                | F      | 42  | Negative   | -        |                 |                 |
| 10                     | 19            | C028732                | M      | 33  | Positive   | Mild     | Positive        | Positive        |
|                        | 20            | C028733                | F      | 35  | Negative   | -        |                 |                 |
| 11                     | 21            | C028736                | M      | 36  | Positive   | Mild     | Positive        | Positive        |
|                        | 22            | C028737                | F      | 35  | Negative   | -        |                 |                 |
| 12                     | 23            | C028738                | F      | 54  | Positive   | Mild     | Positive        | Positive        |
|                        | 24            | C028739                | M      | 54  | Negative   | -        |                 |                 |
| 13                     | 25            | C028740                | M      | 42  | Positive   | Mild     | Positive        | Positive        |

## Supplementary Material

|    |    |         |   |    |          |          |                 |                 |
|----|----|---------|---|----|----------|----------|-----------------|-----------------|
|    | 26 | C028741 | F | 48 | Negative | -        |                 |                 |
| 14 | 27 | C028744 | M | 71 | Positive | Mild     | Positive        | Positive        |
|    | 28 | C028745 | F | 68 | Negative | -        |                 |                 |
| 15 | 29 | C028746 | F | 30 | Positive | Mild     | Positive        | Positive        |
|    | 30 | C028747 | F | 29 | Negative | -        |                 |                 |
| 16 | 31 | C028748 | F | 62 | Positive | Moderate | Positive        | Positive        |
|    | 32 | C028749 | M | 61 | Negative | -        |                 |                 |
| 17 | 33 | C028750 | M | 52 | Positive | Mild     | <b>Negative</b> | <b>Negative</b> |
|    | 34 | C028751 | F | 54 | Negative | -        |                 |                 |
| 18 | 35 | C028752 | M | 56 | Positive | Mild     | Positive        | Positive        |
|    | 36 | C028753 | F | 55 | Negative | -        |                 |                 |
| 19 | 37 | C028757 | M | 54 | Positive | Mild     | Negative        | Positive        |
|    | 38 | C028758 | F | 45 | Negative | -        |                 |                 |
| 20 | 39 | C028764 | M | 70 | Positive | Mild     | <b>Negative</b> | <b>Negative</b> |
|    | 40 | C028765 | F | 56 | Negative | -        |                 |                 |
| 21 | 41 | C028766 | F | 34 | Positive | Mild     | Positive        | Positive        |
|    | 42 | C028767 | M | 35 | Negative | -        |                 |                 |
| 22 | 43 | C028776 | M | 64 | Positive | Mild     | Positive        | Positive        |
|    | 44 | C028777 | F | 60 | Negative | -        |                 |                 |
| 23 | 45 | C028778 | M | 37 | Positive | Mild     | Positive        | Positive        |
|    | 46 | C028779 | F | 29 | Negative | -        |                 |                 |
| 24 | 47 | C028780 | M | 49 | Positive | Mild     | Positive        | Positive        |
|    | 48 | C028781 | F | 51 | Negative | -        |                 |                 |
| 25 | 49 | C028782 | M | 56 | Positive | Moderate | Positive        | Positive        |
|    | 50 | C028783 | F | 55 | Negative | -        |                 |                 |
| 26 | 51 | C028791 | F | 25 | Positive | Mild     | Positive        | Positive        |
|    | 52 | C028792 | M | 24 | Negative | -        |                 |                 |
| 27 | 53 | C028799 | F | 55 | Positive | Moderate | Positive        | Positive        |
|    | 54 | C028800 | M | 53 | Negative | -        |                 |                 |
| 28 | 55 | C028806 | M | 43 | Positive | Mild     | Negative        | Positive        |
|    | 56 | C028807 | F | 47 | Negative | -        |                 |                 |
| 29 | 57 | C028812 | F | 36 | Positive | Mild     | Positive        | Positive        |
|    | 58 | C028813 | M | 38 | Negative | -        |                 |                 |
| 30 | 59 | C028814 | F | 33 | Positive | Mild     | Positive        | Positive        |
|    | 60 | C028815 | M | 35 | Negative | -        |                 |                 |
| 31 | 61 | C028825 | M | 64 | Positive | Mild     | Positive        | Positive        |
|    | 62 | C028826 | F | 58 | Negative | -        |                 |                 |

|    |    |         |   |    |          |          |                 |                 |
|----|----|---------|---|----|----------|----------|-----------------|-----------------|
| 32 | 63 | C028827 | F | 26 | Positive | Mild     | Positive        | Positive        |
|    | 64 | C028828 | M | 25 | Negative | -        |                 |                 |
| 33 | 65 | C028838 | M | 49 | Positive | Mild     | Positive        | Positive        |
|    | 66 | C028839 | F | 47 | Negative | -        |                 |                 |
| 34 | 67 | C028840 | M | 82 | Positive | Mild     | Positive        | Positive        |
|    | 68 | C028841 | F | 79 | Negative | -        |                 |                 |
| 35 | 69 | C028848 | M | 33 | Positive | Mild     | Positive        | Positive        |
|    | 70 | C028849 | F | 30 | Negative | -        |                 |                 |
| 36 | 71 | C028852 | M | 58 | Positive | Mild     | Negative        | Positive        |
|    | 72 | C028853 | F | 54 | Negative | -        |                 |                 |
| 37 | 73 | C028856 | M | 46 | Positive | Moderate | Positive        | Positive        |
|    | 74 | C028857 | F | 40 | Negative | -        |                 |                 |
| 38 | 75 | C028863 | M | 37 | Positive | Mild     | Negative        | Positive        |
|    | 76 | C028864 | M | 29 | Negative | -        |                 |                 |
| 39 | 77 | C028865 | M | 45 | Positive | Mild     | Positive        | Positive        |
|    | 78 | C028866 | F | 45 | Negative | -        |                 |                 |
| 40 | 79 | C028869 | M | 32 | Positive | Mild     | <b>Negative</b> | <b>Negative</b> |
|    | 80 | C028870 | F | 31 | Negative | -        |                 |                 |
| 41 | 81 | C028871 | M | 62 | Positive | Mild     | Positive        | Positive        |
|    | 82 | C028872 | F | 53 | Negative | -        |                 |                 |
| 42 | 83 | C028873 | F | 40 | Positive | Mild     | <b>Negative</b> | <b>Negative</b> |
|    | 84 | C028874 | M | 50 | Negative | -        |                 |                 |
| 43 | 85 | C028882 | M | 40 | Positive | Mild     | Positive        | Positive        |
|    | 86 | C028883 | F | 42 | Negative | -        |                 |                 |
| 44 | 87 | C028885 | F | 44 | Positive | Mild     | <b>Negative</b> | <b>Negative</b> |
|    | 88 | C028886 | M | 46 | Negative | -        |                 |                 |
| 45 | 89 | C028887 | F | 42 | Positive | Mild     | Positive        | Negative        |
|    | 90 | C028888 | M | 28 | Negative | -        |                 |                 |
| 46 | 91 | C028890 | F | 46 | Positive | Mild     | <b>Negative</b> | <b>Negative</b> |
|    | 92 | C028891 | M | 47 | Negative | -        |                 |                 |
| 47 | 95 | C028894 | M | 38 | Positive | Mild     | <b>Negative</b> | <b>Negative</b> |
|    | 96 | C028895 | F | 33 | Negative | -        |                 |                 |

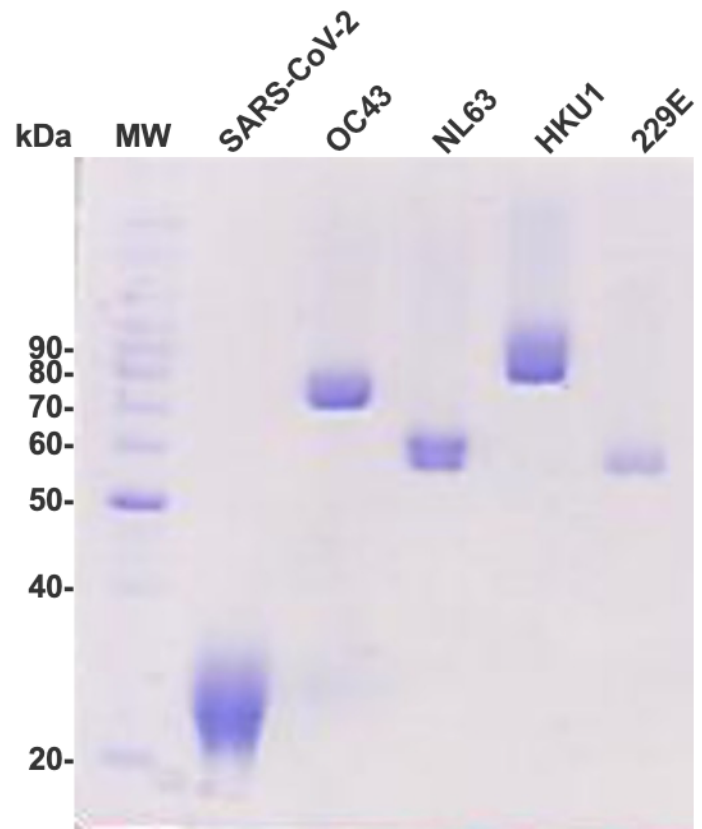

**Supplementary Figure 1. RBDs from HCoV and SARS-CoV-2.** RBDs were produced by transient transfection of Expi293 cells. Two  $\mu\text{g}$  of each protein were run on a polyacrylamide gel (SDS-PAGE 12%). Molecular weight in kDa is indicated on the left.

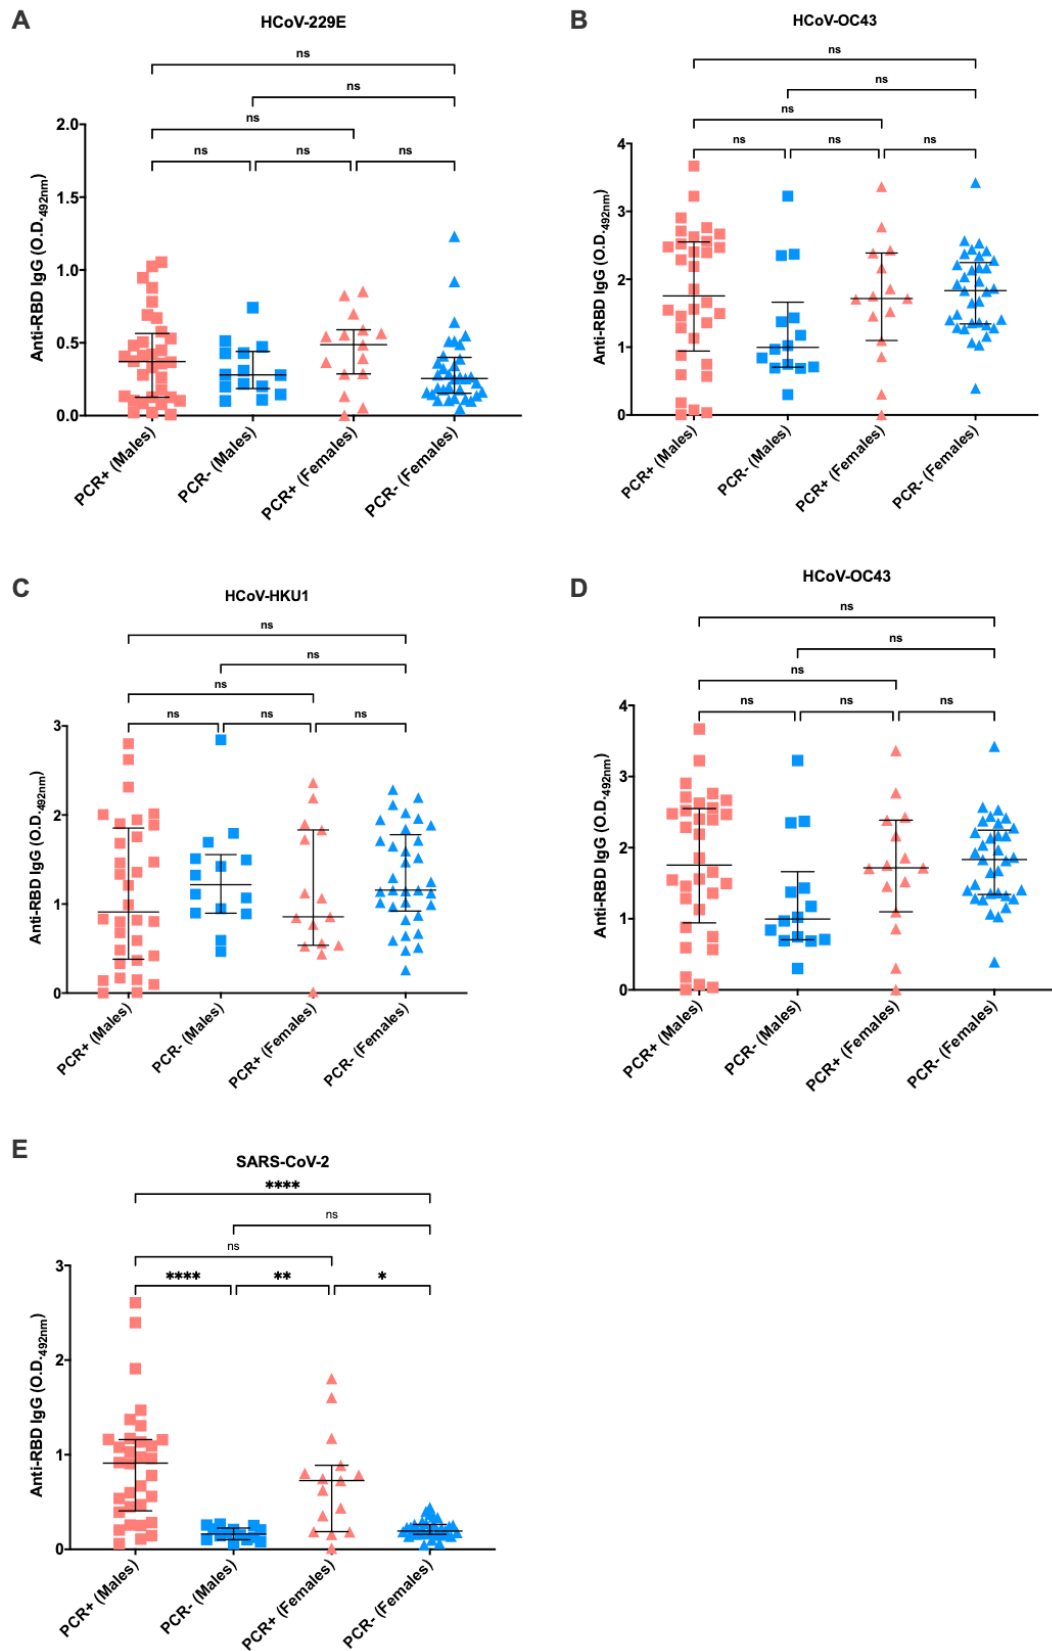

**Supplementary Figure 2. Anti-RBD IgG serology profile of HCoV-229E, HCoV-OC43, HCoV-NL63 and HCoV HKU1 divided by gender. IgG response profile of PCR+ (males=32; females=15)**

or PCR- (males=14; females= 33) for SARS-CoV-2 against RBD proteins derived from alphacoronaviruses HCoV-229E (A) and HCoV-NL63 (B), betacoronaviruses HCoV-OC43 (C) and HCoV-HKU1 (D), and SARS-CoV-2 (E). For this assay, the subjects' plasma was used at a concentration of 1:100, and the recombinant RBD in 2  $\mu\text{g/ml}$  (100 ng/well). The test was read in the wavelength of 492 nm and each graph shows the O.D. obtained for the PCR+ (red) or PCR- (blue) individuals for SARS-CoV-2. The horizontal black lines represent the medians $\pm$ interquartile intervals. Kruskal-Wallis followed by the Dunn's test. ns= not significant.
